# Supplementary material for: Lineage tracing analysis of cone photoreceptor associated cis-regulatory elements in the developing chicken retina
Source: PubMed Central journal article supplement (PMC6597718; doi:10.1038/s41598-019-45750-7), 2019-06-27
Supplement: 41598_2019_45750_MOESM1_ESM.pdf [file 41598_2019_45750_MOESM1_ESM.pdf]

## Lineage tracing analysis of cone photoreceptor-associated cis-regulatory elements in the developing chicken retina

Estie Schick<sup>1</sup>, Sean D. McCaffery<sup>1</sup>, Erin E. Keblish<sup>2</sup>, Cassandra Thakurdin<sup>2,3</sup>, Mark M. Emerson<sup>1,2\*</sup>

<sup>1</sup> Biology Ph.D. Program, Graduate Center, City University of New York, New York, NY, 10031

<sup>2</sup> Department of Biology, The City College of New York, City University of New York, New York, NY, 10031

<sup>3</sup> Current address: Division of Hematology and Medical Oncology, Laura and Isaac Perlmutter Cancer Center, New York University Langone Medical Center, New York, NY 10016

\*Corresponding author: [memerson@ccny.cuny.edu](mailto:memerson@ccny.cuny.edu)

### Email addresses:

Estie Schick: [estieschick@gmail.com](mailto:estieschick@gmail.com)

Sean D. McCaffery: [sean.d.mccaffery@gmail.com](mailto:sean.d.mccaffery@gmail.com)

Erin E. Keblish: [erinkeb@gmail.com](mailto:erinkeb@gmail.com)

Cassandra Thakurdin: [cthakurdin15@gmail.com](mailto:cthakurdin15@gmail.com)

Mark M. Emerson: [memerson@ccny.cuny.edu](mailto:memerson@ccny.cuny.edu)

Supplementary Table S1. Primer Sequences

|                                                                                                                   |                                                                                 |
|-------------------------------------------------------------------------------------------------------------------|---------------------------------------------------------------------------------|
| **Bolded nucleotides correspond to restriction sites, italicized nucleotides correspond to attB or attP sequences |                                                                                 |
| PhiC31 Xma1-tagged forward primer                                                                                 | 5' AG <b>CCCCGGG</b> ACCATGGATACCTACGCCGGAGCC 3'                                |
| PhiC31 BsrG1-tagged reverse primer                                                                                | 5' AG <b>TGTACAT</b> CACACTTCCGCTTTTTCTT 3'                                     |
| attPlongNeoF1                                                                                                     | 5' <i>TTTGAGTTCTCTCAGTTGGGGGCGTAGTCGGATTTGATCTGATCAAGAG</i> 3'                  |
| attBLongNeoR1                                                                                                     | 5' <i>CCAAGGGCACGCCCTGGCACCCGCACCGCGGCTTCGAGACGCGTTCGGATTTGATCCAG</i> 3'        |
| attPLongNeoF2                                                                                                     | 5' <b>GACTCGAGGTGCCCAACTGGGGTAAC</b> <i>TTTGAGTTCTCTCAGTTGGGGGCG</i> 3'         |
| attBLongNeoR2                                                                                                     | 5' <b>AGCTCGAGGATGGGTGAGGTGGAGTACGCGCCCGGGGAGCCCAAGGGCACG</b> <i>CCCTGGC</i> 3' |
| attP total sequence                                                                                               | 5' GTGCCCAACTGGGGTAACCTTTGAGTTCTCTCAGTTGGGGGCGTAG 3'                            |
| attB total sequence                                                                                               | 5' CTCGAAGCCGCGGTGCGGGTGCCAGGGCGTGCCCTTGGGCTCCCCGGGCGCGTACTCCACCTCACCCATC 3'    |
| VisPeak Forward primer                                                                                            | 5' TAGCGCTCCTTAATGACCGG 3'                                                      |
| VisPeak Reverse primer                                                                                            | 5' GCGGGATTAAAGCGGTCGT 3'                                                       |
| VisPeak Bcu1-tagged forward primer                                                                                | 5' <b>ATTACTAGTTAGCACTCCTTAATGACCGG</b> 3'                                      |
| VisPeak Reverse primer                                                                                            | 5' <b>TTCACTAGTGATTGCGGGATT</b> 3'                                              |

Supplementary Table S2. FlpE/ACTB intron Geneblock sequence

|                                                                                                                                                                                                                                                                                                                                                                                                                                                                                                                                                                                                                                                                                                                                                                                                                                                                                                                                                                                                                                                                                                                                                                                                                                                                                                                                                  |
|--------------------------------------------------------------------------------------------------------------------------------------------------------------------------------------------------------------------------------------------------------------------------------------------------------------------------------------------------------------------------------------------------------------------------------------------------------------------------------------------------------------------------------------------------------------------------------------------------------------------------------------------------------------------------------------------------------------------------------------------------------------------------------------------------------------------------------------------------------------------------------------------------------------------------------------------------------------------------------------------------------------------------------------------------------------------------------------------------------------------------------------------------------------------------------------------------------------------------------------------------------------------------------------------------------------------------------------------------|
| <p>**Shaded nucleotides correspond to Swa1 and Age1 restriction sites, respectively. Underlined nucleotides refer to conserved exon sequences, bolded nucleotides correspond to the ActinB intron sequence.</p> <p>CAGTTCGAATCATCGGAAGAAGCAGATAAGGGAAATAGCCACAGTAAAAAATGCTTAAAGCACTTCTAAGTG<br/> AGGGTCAAAGCATCTGGGAGATCACTGAGAAAATACTAAATTCGTTTGGAGTATACCTCGAGATTTACAAAAACA<br/> AAAACCTTATACCAATTCCTCCTAGCTACTTTCATCAATTGTGGAAGATTCAGCGATATTAAGAAGTTGATC<br/> CGAAATCATTAAATTAGTCCAAAATAAGTATCTGGGAGTAATAATCCAGTGTTTAGTGACAGAGACAAAGACA<br/> AGCGTTAGTAGGCACATATACTTCTTAGCGCAAGGGGTAGGATCGATCCACTTGTATATTTGGATGAATTTTTG<br/> AGGAACTCTGAACCGTCCTAAAACGAGTAAATAGGACCGGCAATTCTTCAAGCAACAAACAGGTAAGTGACC<br/> <b>TGTTACTTTGGGAGTGGCAAGCCTGGGGTTTTCTGGGGATCGATGCCGGTGCTAAGAAGGCTGTTCCCTTCC</b><br/> <b>ACAGGA</b>ATACCAATTATTAAGATAACTTAGTCAGATCGTACAACAAGGCTTTGAAGAAAAATGCGCCTTATC<br/> CAATCTTTGCTATAAAGAATGGCCCAAAATCTCACATTGGAAGACATTTGATGACCTCATTCTGTCAATGAAGG<br/> GCCTAACGGAGTTGACTAATGTTGTGGGAAATTGGAGCGATAAGCGTGCTTCTGCCGTGGCCAGGACAACGTA<br/> TACTCATCAGATAACAGCAATACCTGATCACTACTTCGACTAGTTTCTCGGTACTATGCATATGATCCAATATCA<br/> AAGGAAATGATAGCATTGAAGGATGAGACTAATCCAATTGAGGAGTGGCAGCATATAGAACAGCTAAAGGGT<br/> AGTGCTGAAGGAAGCATAACGATACCCCGCATGGAATGGGATAATATCACAGGAGGTACTAGACTACCTTTCAT<br/> CCTACATAAATAGACGCATAGGACCGGTGGAACAAAAAC</p> |
|--------------------------------------------------------------------------------------------------------------------------------------------------------------------------------------------------------------------------------------------------------------------------------------------------------------------------------------------------------------------------------------------------------------------------------------------------------------------------------------------------------------------------------------------------------------------------------------------------------------------------------------------------------------------------------------------------------------------------------------------------------------------------------------------------------------------------------------------------------------------------------------------------------------------------------------------------------------------------------------------------------------------------------------------------------------------------------------------------------------------------------------------------------------------------------------------------------------------------------------------------------------------------------------------------------------------------------------------------|

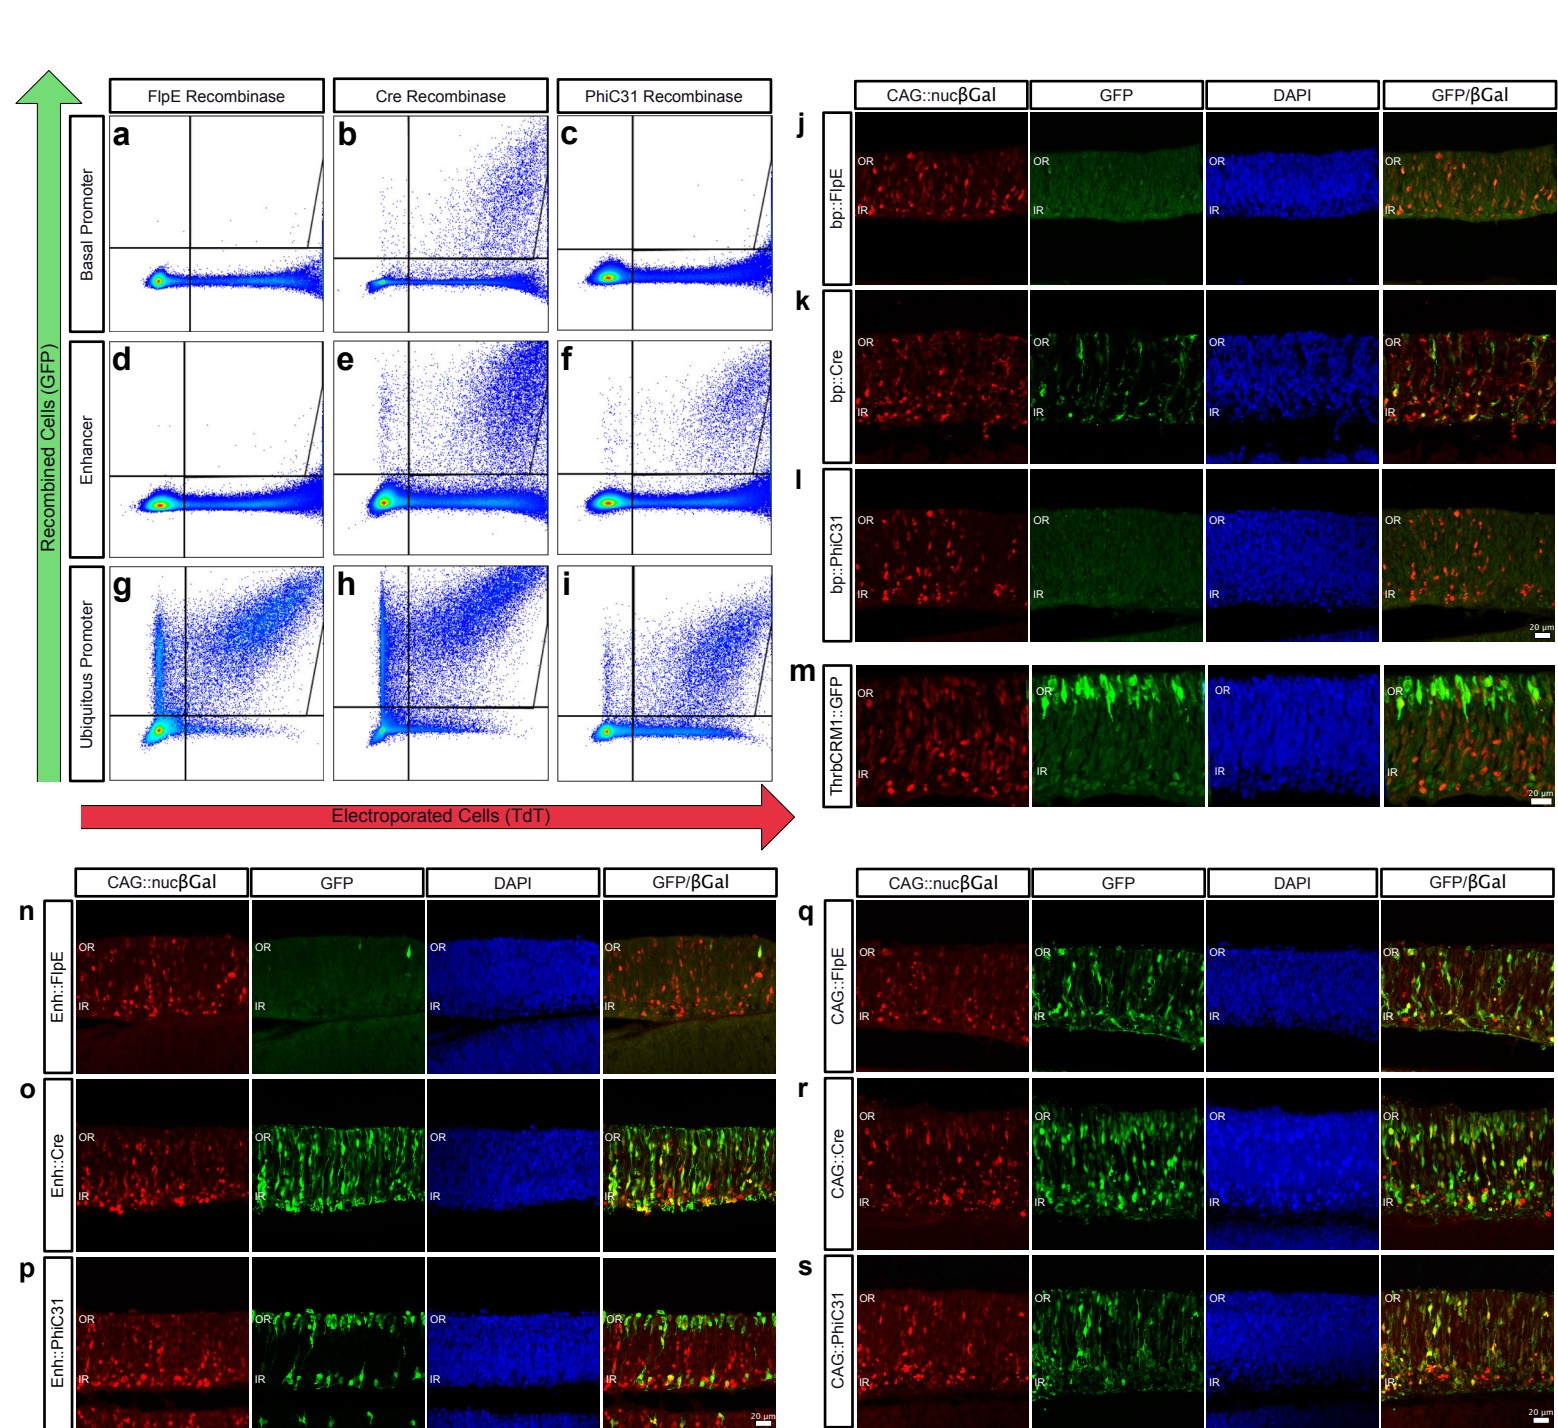

**Supplementary Figure S1. Quantitative and qualitative assessment of lineage trace recombination efficiencies mediated by FlpE, Cre and PhiC31.**

A–I. E5 retinas were electroporated ex vivo with CAG::Tdt, the recombinase plasmid shown by the labels on the x and y axes, and the appropriate responder plasmid. Retinas were harvested after 2 days in culture, dissociated and quantitated by flow cytometry.

J–S. E5 retinas were electroporated ex vivo with CAG::nucβgal, the recombinase plasmid shown on the left, and the appropriate responder plasmid. Retinas were harvested after 2 days in culture and imaged by confocal microscopy for βgal (red), GFP (green) and DAPI (blue).

J–L. Representative images of basal recombination in retinas electroporated ex vivo with bp::FlpE (a), bp::Cre (b) or bp::PhiC31 (c).

M. Representative image of ThrbCRM1 enhancer activity. Retinas were electroporated ex vivo at E5 with ThrbCRM1::GFP and CAG::nucβgal, and harvested after two days in culture. Maximum intensity projection of 40x image.

N–P. Representative images of enhancer-driven recombination in retinas electroporated ex vivo with ThrbCRM1::FlpE (d), ThrbCRM1::Cre (e) or ThrbCRM1::PhiC31 (f).

Q–S. Representative images of ubiquitous recombination in retinas electroporated ex vivo with CAG::FlpE (g), CAG::Cre (h) or CAG::PhiC31 (i).

OR, outer retina; IR, inner retina; bp, basal promoter; Enh, enhancer.

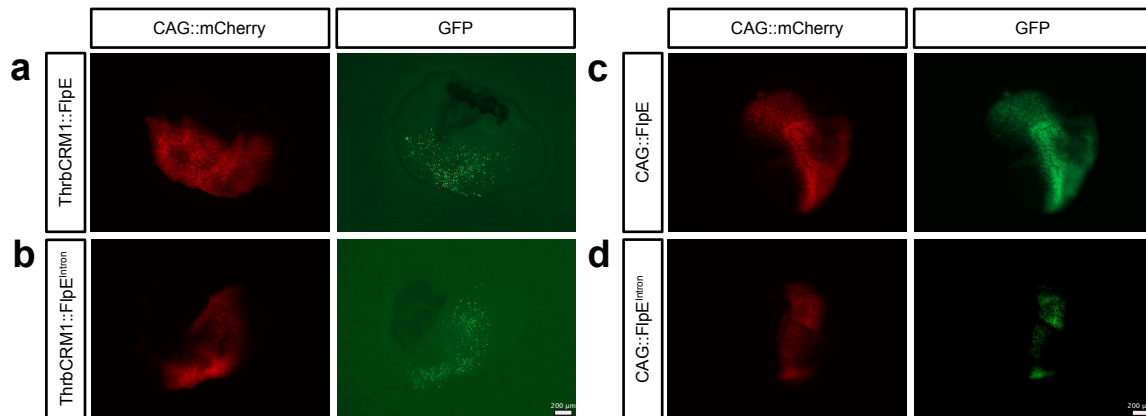

Supplementary Figure S2. Effects of insertion of an intron into FlpE on FlpE activity.

A–B. Representative images of whole retinas electroporated ex vivo with CAG::mCherry as an electroporation control, ThrbCRM1::FlpE (a) or ThrbCRM1::FlpE<sup>intron</sup> (b), and CAFNF::GFP at E5 and fixed after two days in culture.

C–D. Representative images of whole retinas electroporated ex vivo with CAG::mCherry as an electroporation control, CAG::FlpE (c) or CAG::FlpE<sup>intron</sup> (d), and CAFNF::GFP at E5 and fixed after two days in culture.

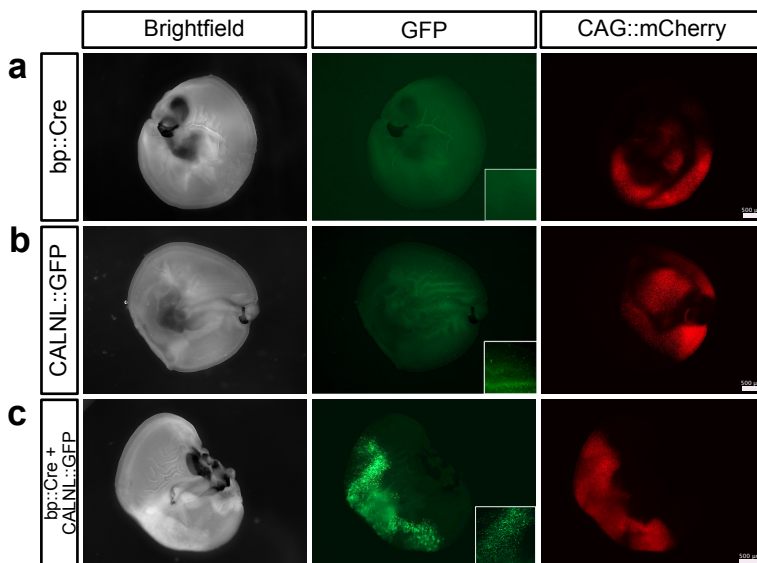

Supplementary Figure S3. Contribution of leaky bp::Cre and CALNL::GFP to basal recombination levels.

A–C. Representative images of whole retinas electroporated ex vivo with CAG::mCherry as an electroporation control, bp::Cre (a), CALNL::GFP (b), or bp::CRE in combination with CALNL::GFP (c) at E5 and fixed after two days in culture.

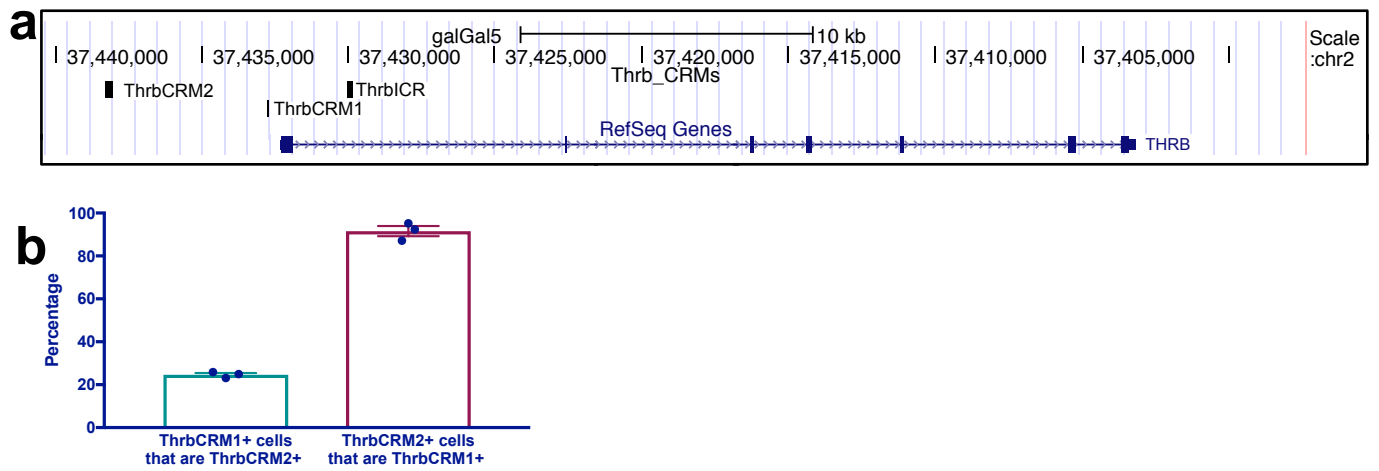

Supplementary Figure S4. Alignment of Thrb enhancers to the chick genome.

A. Alignment of ThrbCRM1, ThrbCRM2 and ThrbICR (originally described in mouse) elements to the Galgal5 genome in UCSC Genome Browser. The Tr $\beta$ 2 isoform is shown in full.

B. Quantification of the % of ThrbCRM2 cells that are in the ThrbCRM1 population from FACS analyzed retinal cells. Error bars represent SEM, n=3. OR, outer retina; IR, inner retina.

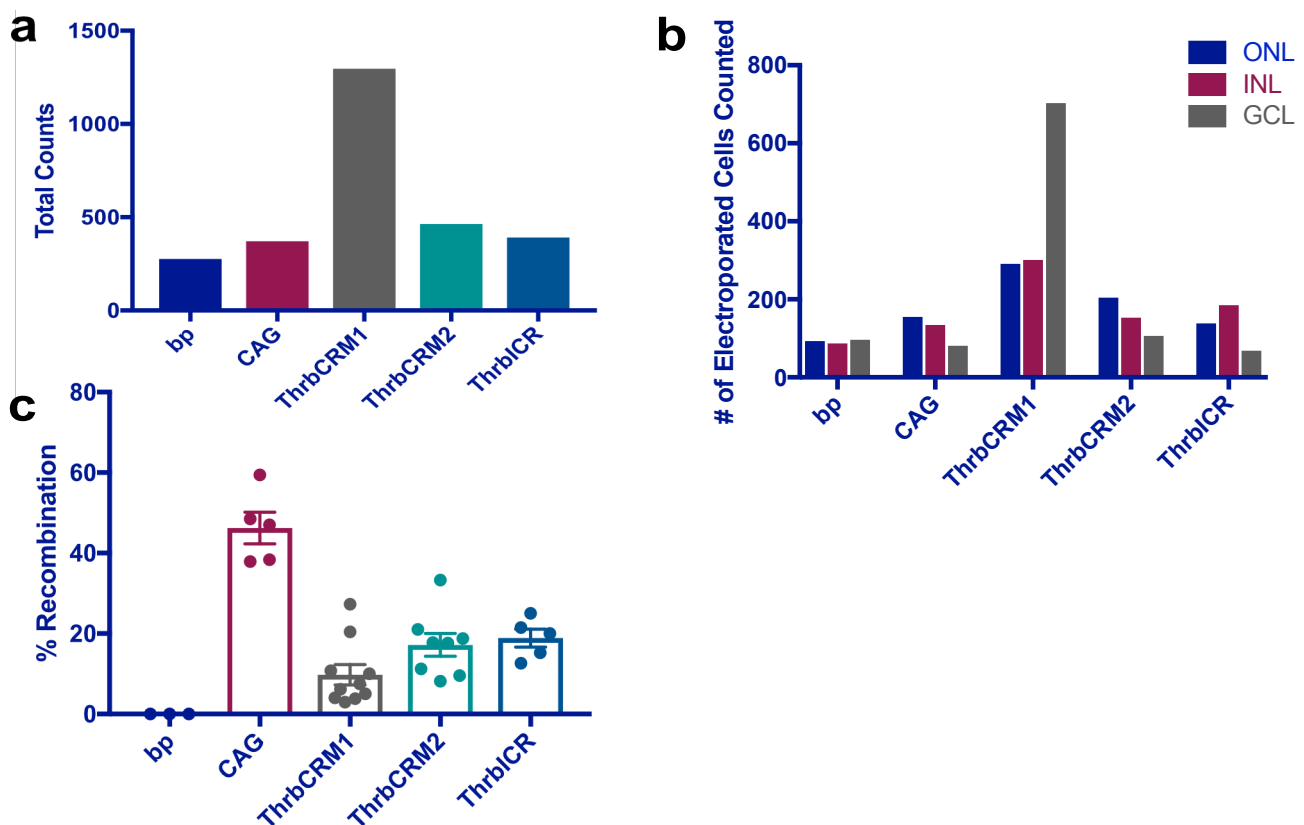

Supplementary Figure S5. Quantification of in vivo lineage tracing of Thrb regulatory elements.

A. Quantification of total number of electroperated cells counted in each of the conditions assessed (as shown in Figure 2a-e). N=3-8.

B. Quantification of the total number of electroperated cells counted per retinal layer in each of the conditions assessed. N=3-8.

C. Quantification of overall % recombination in each condition assessed (Total GFP/Total  $\beta$ gal + GFP only). Error bars represent SEM, n=3-8.

ONL, outer nuclear layer; INL, inner nuclear layer; GCL, ganglion cell layer; bp, basal promoter.

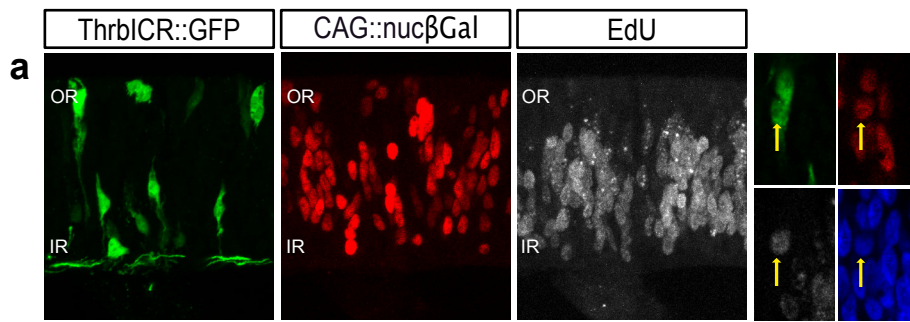

Supplementary Figure S6. The ThrblCR element is active in some dividing cells.

A. Representative confocal image of a retina electroporated ex vivo with CAG::nucβgal as an electroporation control, and ThrblCR::GFP at E5, pulsed with EdU for 1 hour after 1 day in culture, and immediately fixed. Images are maximum intensity projections, zoomed insets are single z-planes. ↑ represents electroporated GFP+/EdU+ cells. OR, outer retina; IR, inner retina.

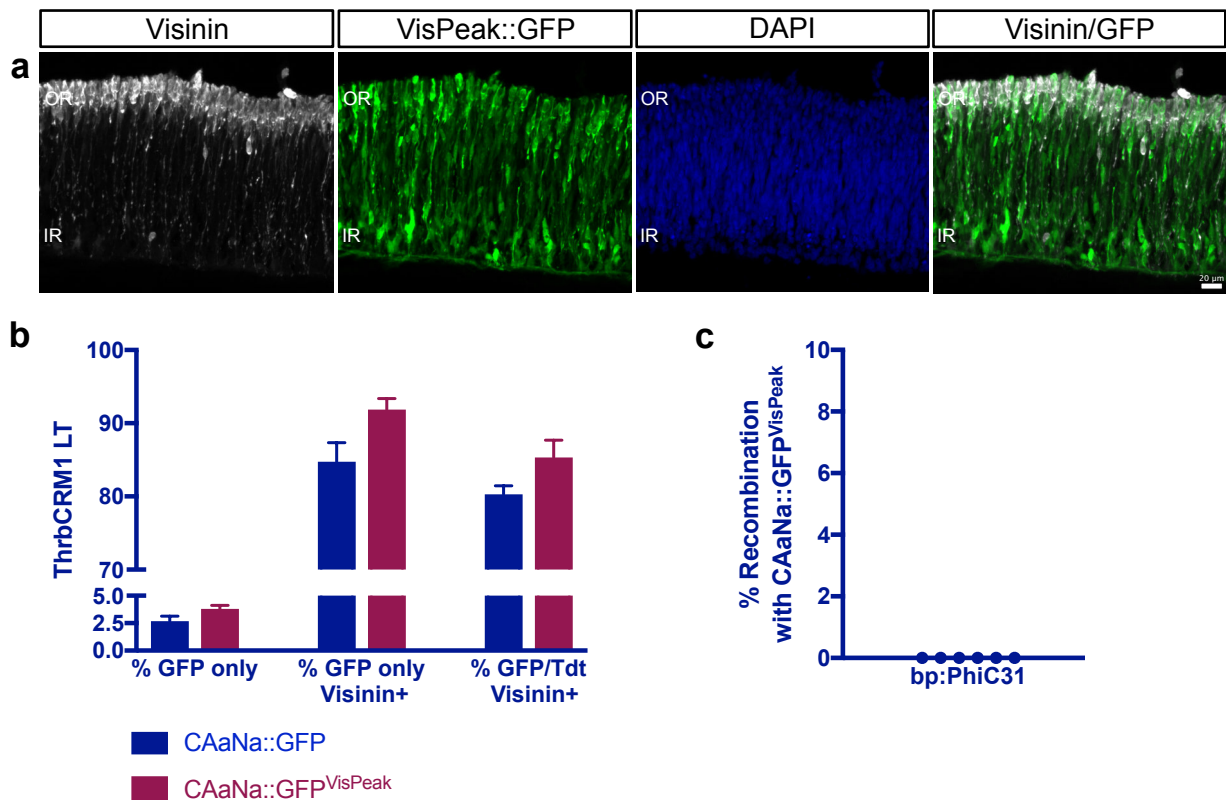

Supplementary Figure S7. Quantitative assessment of CAaNa::GFP modified with VisPeak.

A. Representative image of a retina electroporated ex vivo with VisPeak::GFP plasmid at E5, fixed after 2 days in culture, and counterstained with Visinin. Merge shows extensive colocalization of Visinin with GFP+ cells.

B. Quantification of FACS analyzed retinal cells, electroporated ex vivo at E5 with CAG::Tdt, ThrbCRM1::PhiC31, and CAaNa::GFP or CAaNa::GFP<sup>VisPeak</sup> and dissociated and fixed after two days in culture. Error bars represent SEM, n=3.

C. Quantification of basal recombination in E10 retinas electroporated in ovo at E3 with bp::PhiC31 and CAaNa::GFP<sup>VisPeak</sup>.

OR, outer retina; IR, inner retina; bp, basal promoter.

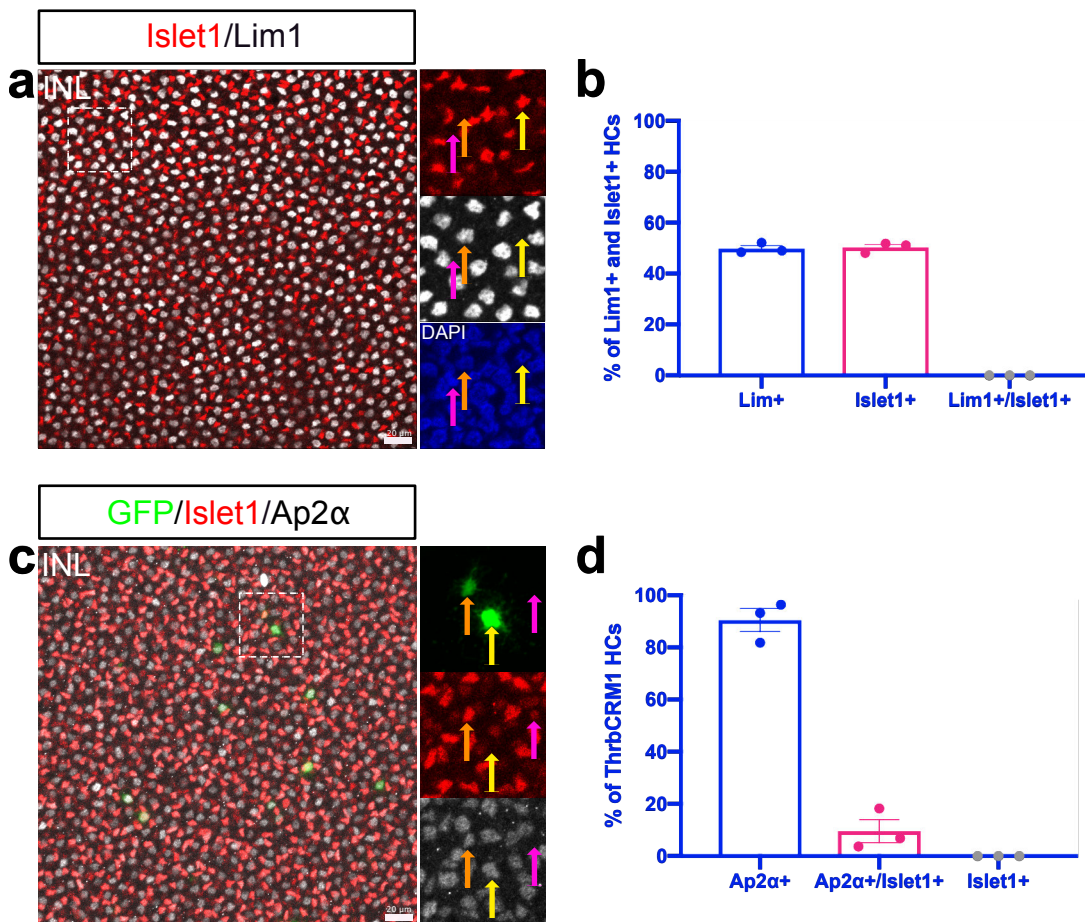

Supplementary Figure S8. Additional immunostaining confirms that the ThrbCRM1 lineage is biased towards H1 HCs over H2–H4 HCs.

A. Representative image of the INL of a WT retina, fixed at E10, and immunostained for Lim1 and Islet1 (DSHB, 39.4D5). Areas zoomed in insets are outlined in dotted line. ↑ represents Lim1+ HCs, ↑ represents Islet1+ HCs, and ↑ represents HCs that are Lim1–/Islet1–. Maximum intensity projection of a 40x image, scale bar represents 20 μm.

B. Quantification of Lim1 and Islet1 immunostained retinas as shown in a– % of HCs marked with Lim1 and/or Islet1 that are Lim1+, that are Islet1+, and that are double positive. Error bars represent SEM, n=3.

C. Representative image of the INL of a ThrbCRM1 lineage traced flat–mounted retina at E10, counterstained for Ap2α and Islet1 (DSHB, 40.2D6). Areas zoomed in insets are outlined in dotted line. ↑ represents Islet1+/ Ap2α+ HCs, ↑ represents Ap2α + HCs, and ↑ represents Islet1+ HCs. Maximum intensity projection of a 40x image, scale bar represents 20 μm.

D. Quantification of Ap2α and Islet1 immunostained retinas as shown in c– % of HCs derived from the ThrbCRM1 lineage marked with Ap2α and/or Islet1. Error bars represent SEM, n=3.
